# Supplementary material for: Investigating the influence of acid sites in continuous methane oxidation with N2O over Fe/MFI zeolites
Source: Royal Society of Chemistry journal article supplement (doi:10.1039/c7cy01769c), 2017-10-11
Supplement: c7cy01769c1.pdf [file c7cy01769c1.pdf]

**Investigating the influence of acid sites in continuous methane oxidation with N<sub>2</sub>O over Fe/MFI zeolites - *Supplemental information***

Ying Kit Chow<sup>a</sup>, Nicholas F. Dummer<sup>a\*</sup>, James Carter<sup>a</sup>, Christopher Williams<sup>a</sup>, Greg Shaw<sup>a</sup>, David Willock<sup>a</sup>, Stuart H. Taylor<sup>a</sup>, Sara Yacob<sup>b</sup>, Randall J. Meyer<sup>b</sup>, Madan Bhasin<sup>c</sup> and Graham J. Hutchings<sup>a\*</sup>

<sup>a</sup> Cardiff Catalysis Institute, School of chemistry, Cardiff University, Cardiff CF10 3AT, UK.

<sup>b</sup> ExxonMobil Research and Engineering Company Technology Center, Annandale, NJ 08801, USA.

<sup>c</sup> Innovative Catalytic Solutions, LLC, Charleston, WV, 25314, USA.

\* Corresponding author email: [dummernf@cardiff.ac.uk](mailto:dummernf@cardiff.ac.uk) and [hutch@cardiff.ac.uk](mailto:hutch@cardiff.ac.uk)

## Tables and Figures

Table S1. Methane oxidation at 300 °C over Fe-SIL-1 catalysts prepared with different Fe deposition methods.

| Catalyst                         | Conversion <sup>a</sup> (%) |                 | Selectivity <sup>a</sup> (%) |      |                 |                               |     | STY <sub>MeOH</sub> <sup>b</sup> (μmol/g/h) |
|----------------------------------|-----------------------------|-----------------|------------------------------|------|-----------------|-------------------------------|-----|---------------------------------------------|
|                                  | N <sub>2</sub> O            | CH <sub>4</sub> | MeOH                         | CO   | CO <sub>2</sub> | C <sub>2</sub> H <sub>4</sub> | DME |                                             |
| SIL-1                            | -                           | -               | -                            | -    | -               | -                             | -   | -                                           |
| 0.5 wt.% Fe-SIL-1 (hydrothermal) | 1.5                         | 0.21            | 0.2                          | 74.3 | 17.9            | -                             | -   | 0.28                                        |
| 0.5 wt.% Fe-SIL-1 (CVI)          | -                           | -               | -                            | -    | -               | -                             | -   | -                                           |
| 0.5 wt.% Fe-SIL-1 (SSIE)         | -                           | -               | -                            | -    | -               | -                             | -   | -                                           |

<sup>a</sup> Values at 1 h; <sup>b</sup> STY<sub>MeOH</sub>: space time yield of methanol; Reaction conditions: 0.44 g catalyst; Pellet Mesh size = 600 μm ; V = 0.9 ml; 2 h; Feed mixture: 20% CH<sub>4</sub> + 2% N<sub>2</sub>O with Ar balance; Flow rate = 55 ml min<sup>-1</sup>; P(total) = 1 atm; GHSV= 3600 h<sup>-1</sup>.

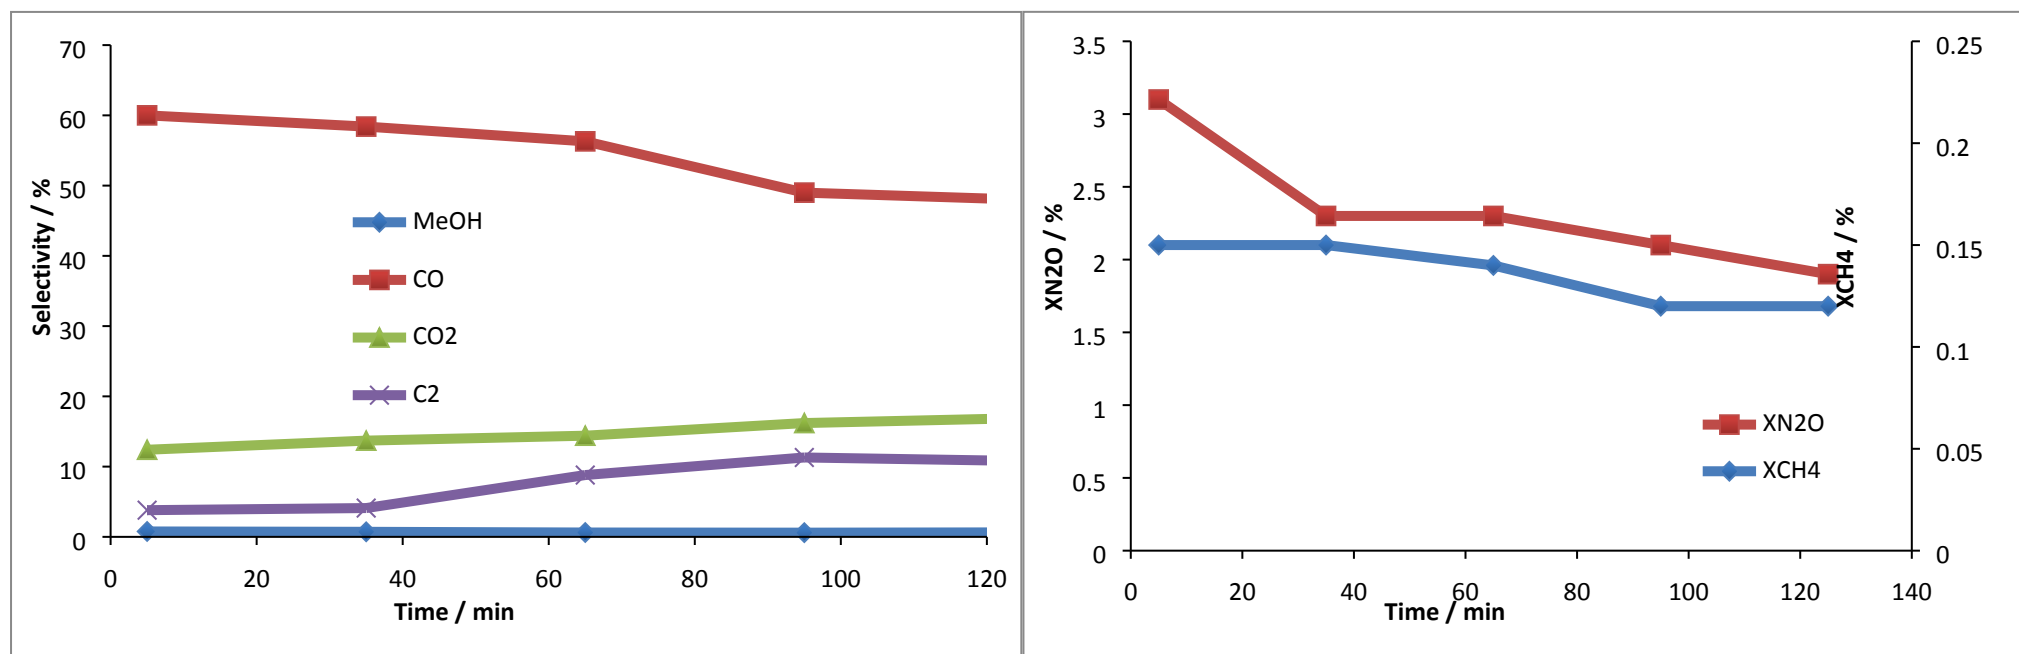

Fig. S1 Time online data for methane oxidation at 300 °C for H-ZSM-5; (a) Product selectivity in the gas phase. (b) CH<sub>4</sub> and N<sub>2</sub>O conversion

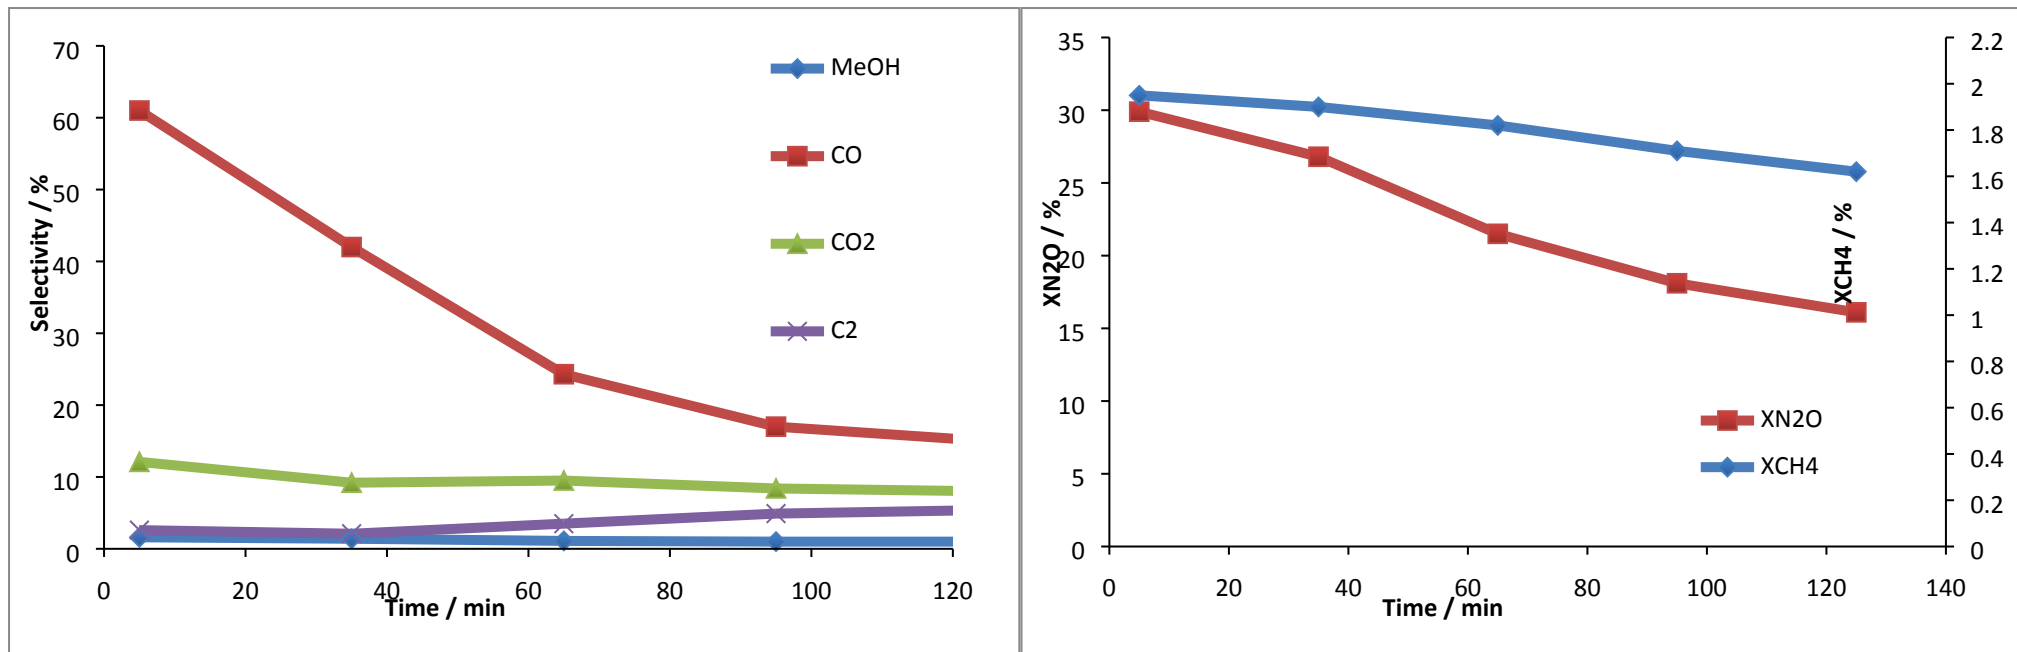

Fig. S2 Time online data for methane oxidation at 300 °C for Fe-ZSM-5 (550 °C); (a) Product selectivity in the gas phase. (b) CH<sub>4</sub> and N<sub>2</sub>O conversion

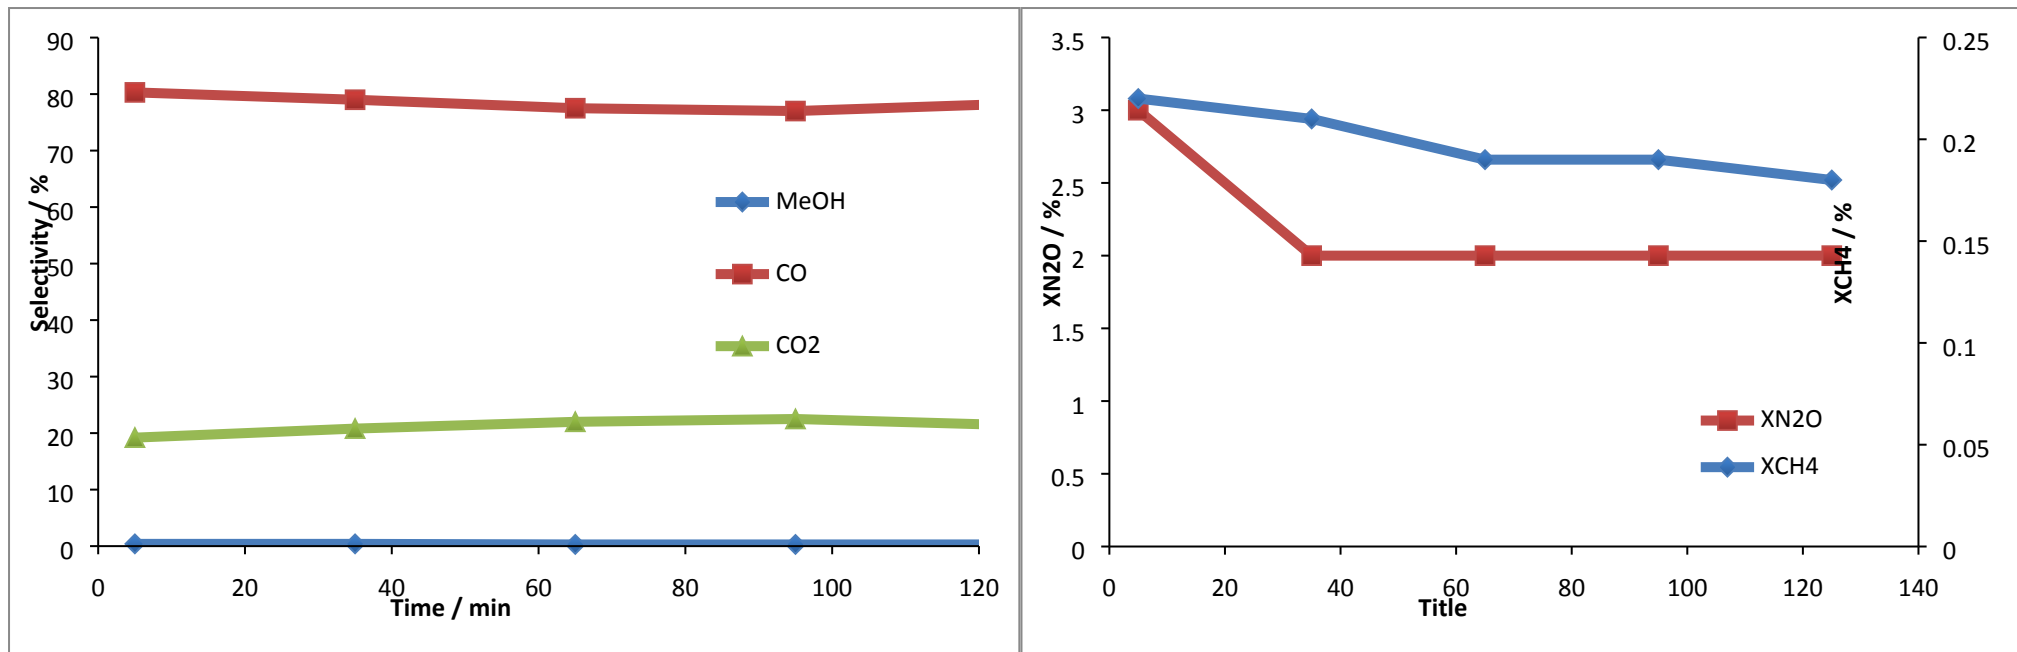

Fig. S3 Time online data for methane oxidation at 300 °C for Fe-SIL-1 (550 °C); (a) Product selectivity in the gas phase. (b) CH<sub>4</sub> and N<sub>2</sub>O conversion

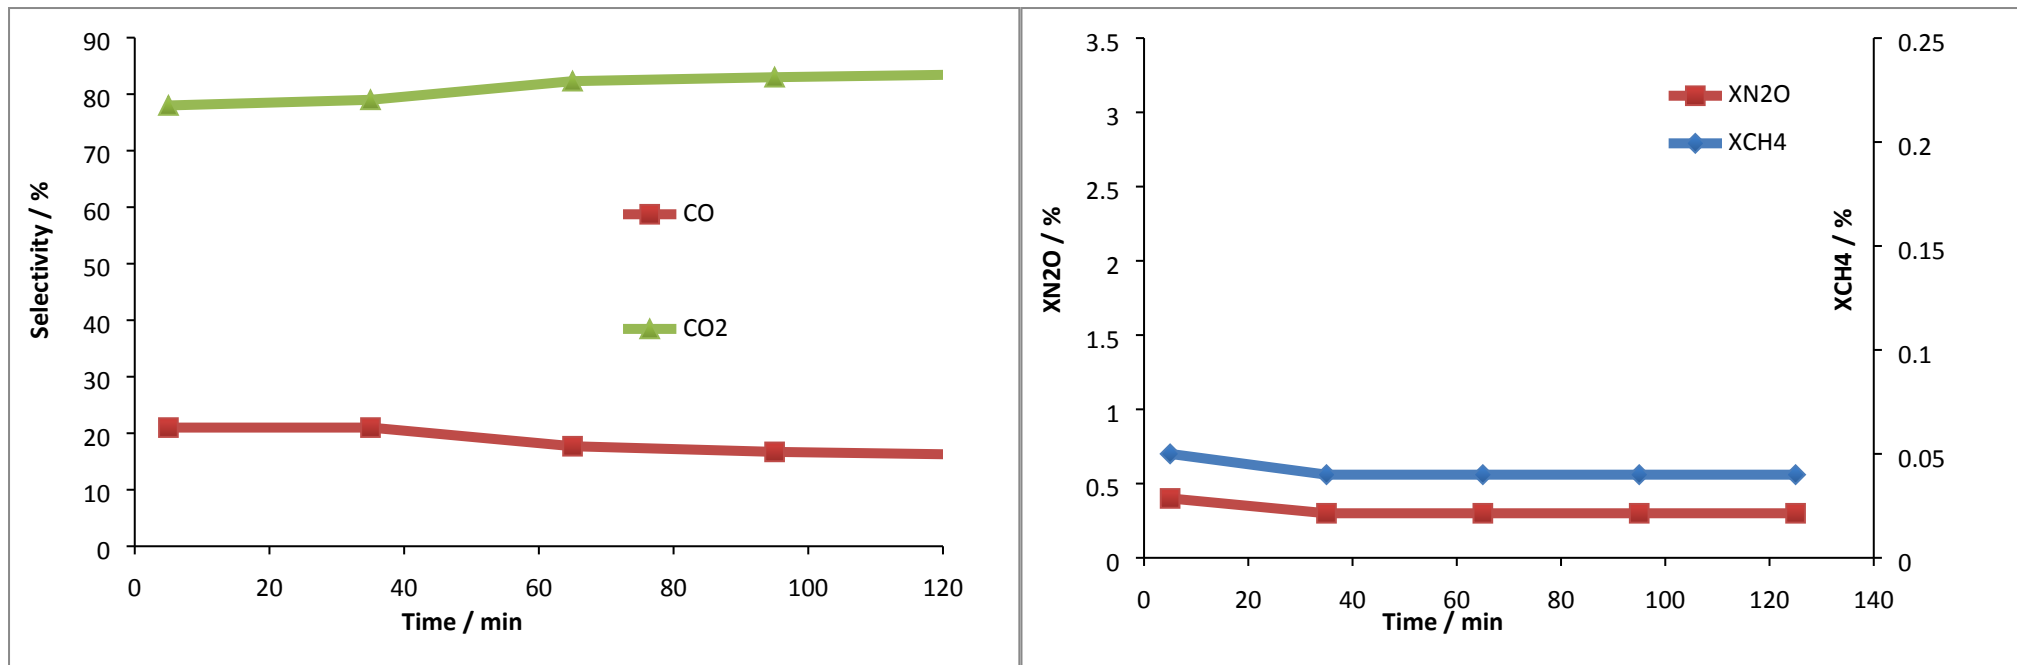

Fig. S4 Time online data for methane oxidation at 300 °C for Fe-TS-1 (550 °C); (a) Product selectivity in the gas phase. (b) CH<sub>4</sub> and N<sub>2</sub>O conversion

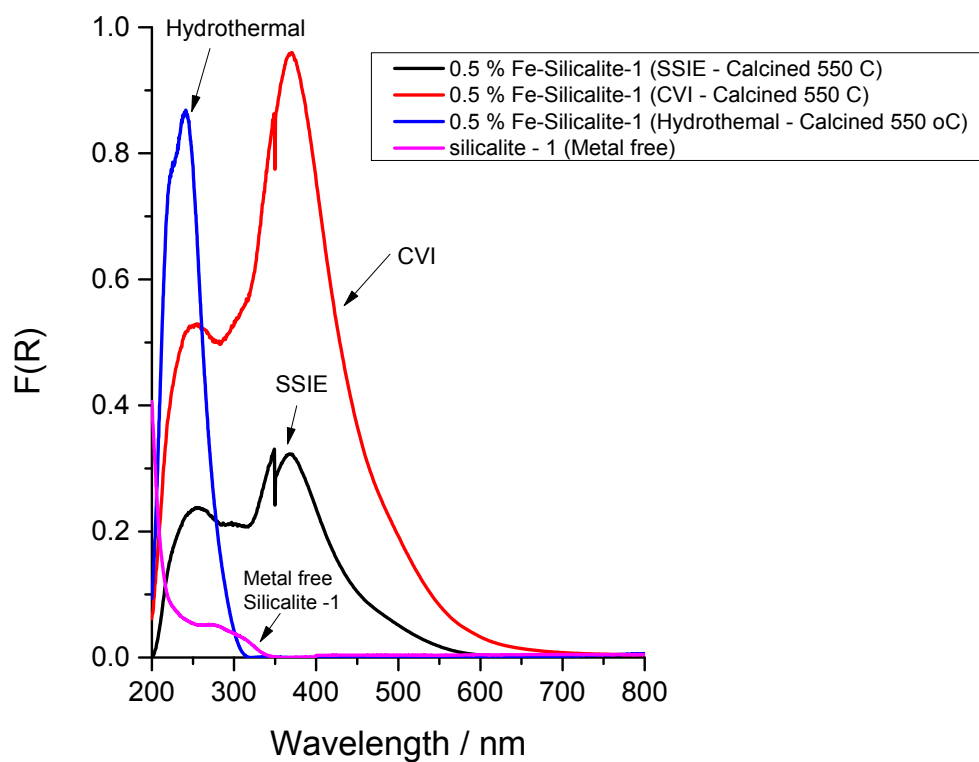

Fig. S5. UV/Vis spectra of Fe-SIL-1 materials prepared via different Fe loading methods.

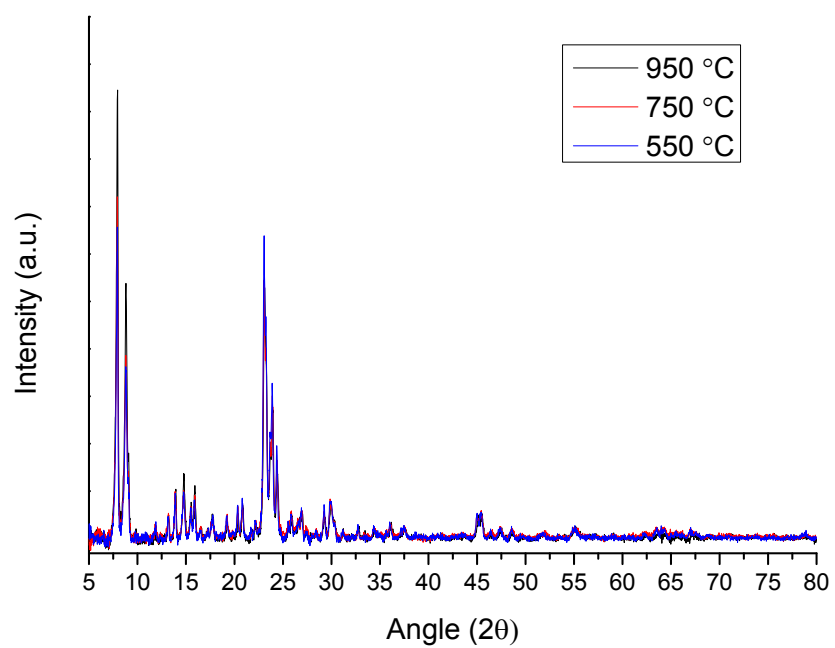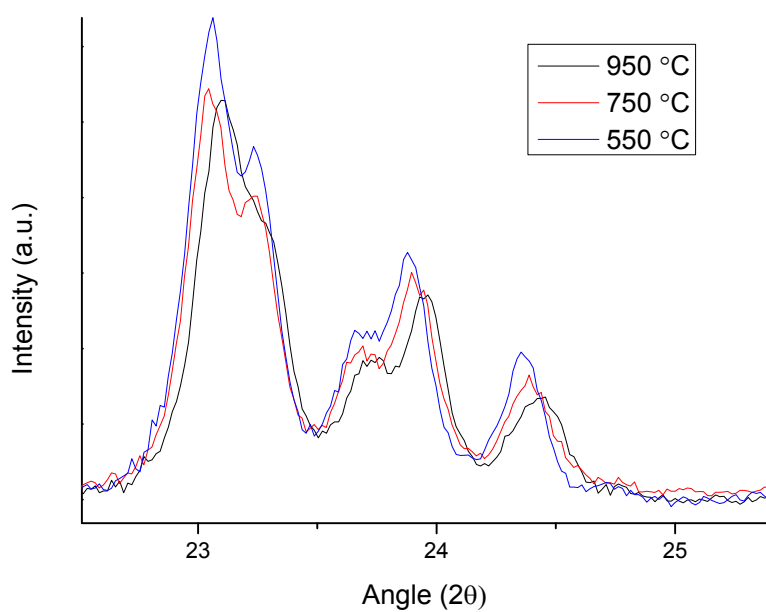

Fig.S6. XRD spectra for the 2 % Fe-ZSM-5 calcined at 550/750/950 °C



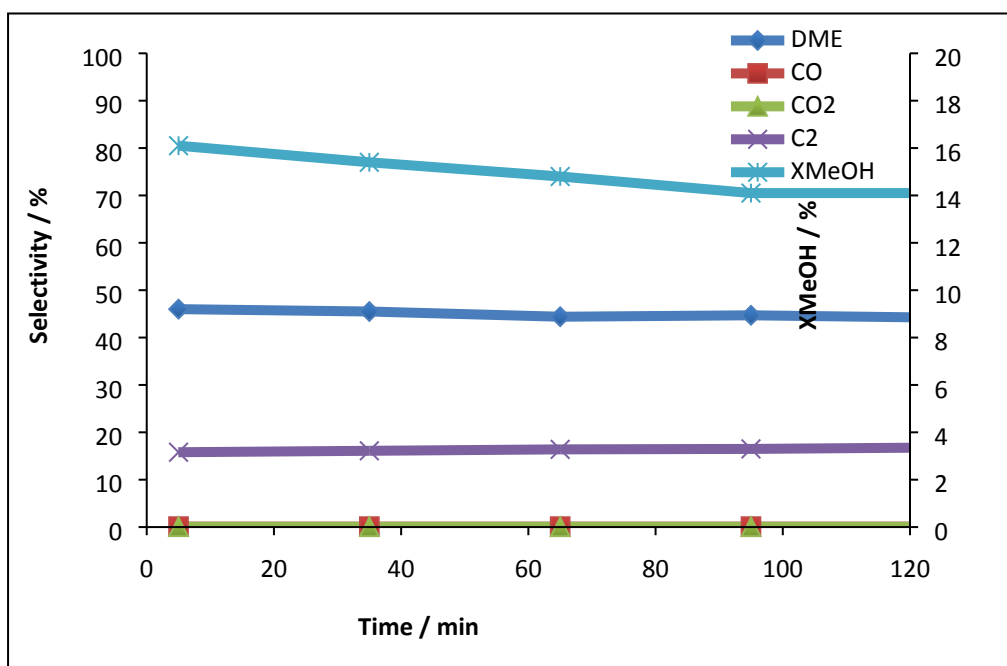

Fig. S7 Time online data for MeOH control experiment at 300 °C for H-ZSM-5

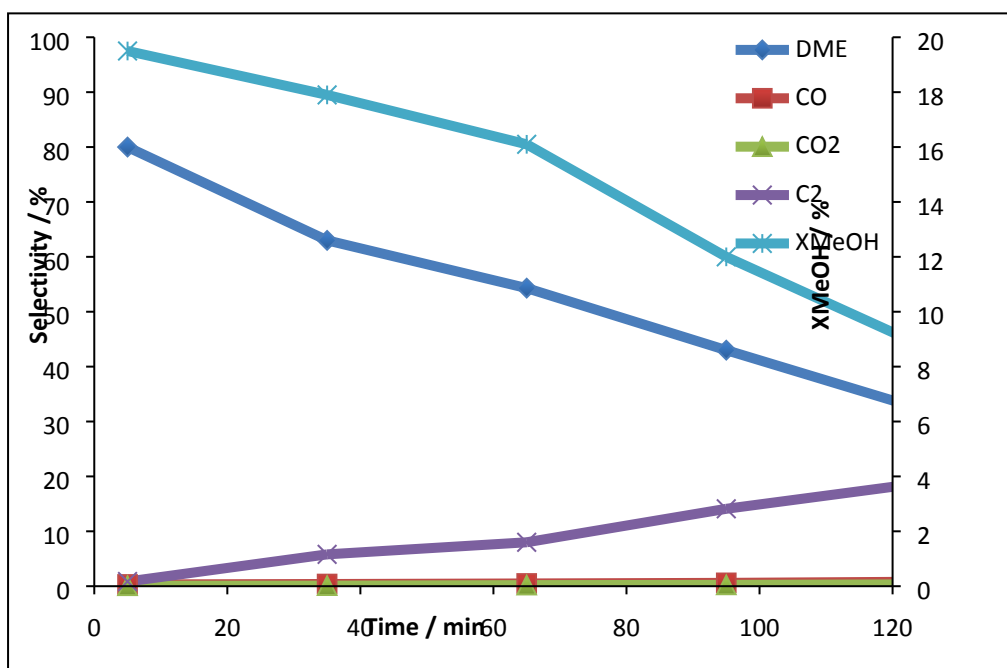

Fig. S8 Time online data for MeOH control experiment at 300 °C for Fe-ZSM-5 calcined 550 °C

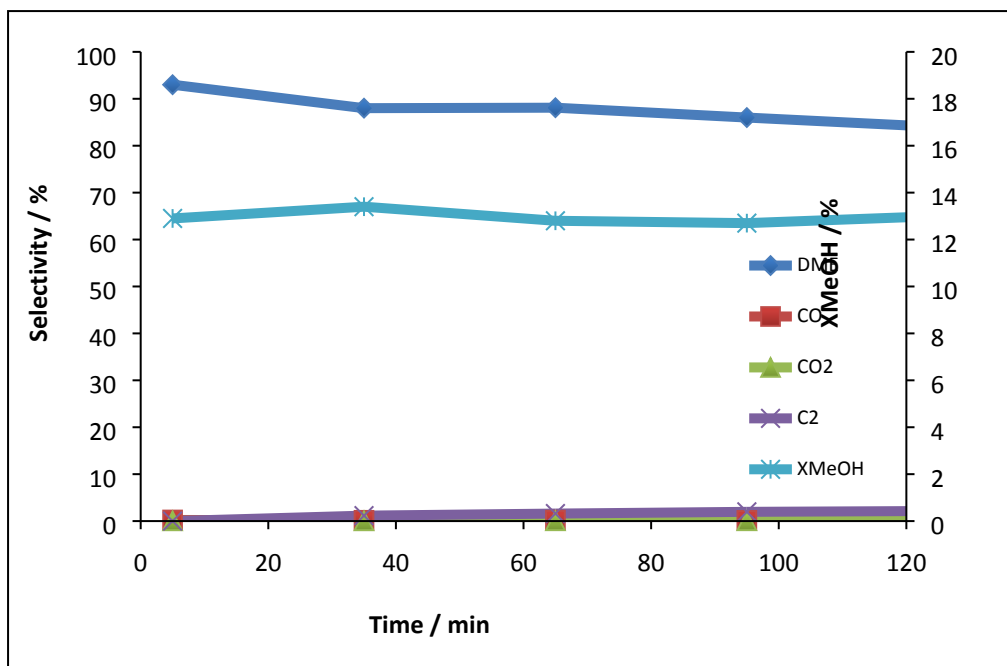

Fig. S9 Time online data for MeOH control experiment at 300 °C for c) 2% Fe-ZSM5 calcined 950 °C

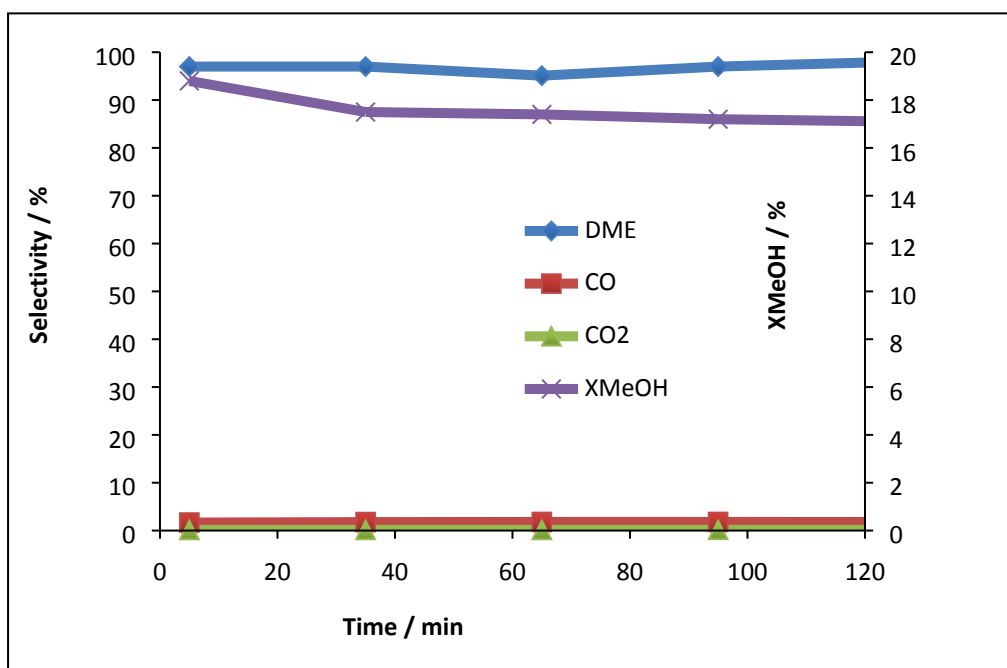

Fig. S10 Time online data for MeOH control experiment at 300 °C for 2% Fe-TS1 calcined 550 °C

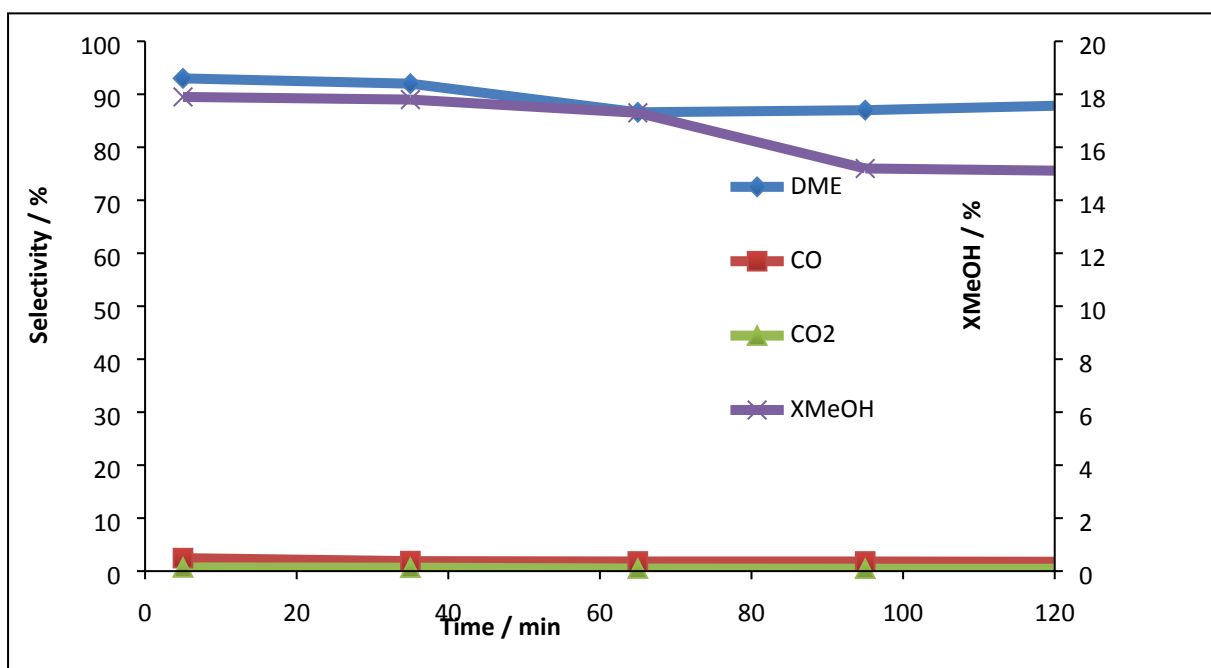

Fig. S11. Time online data for methanol control experiment at 300 °C for 0.5% Fe-SIL-1 steamed 875 °C.
